# Supplementary material for: Lung transplantation for emphysema: only emphysema or something else?
Source: PubMed Central journal article supplement — J Thorac Dis. 2023 Dec 15;15(12):6741–51. doi: 10.21037/jtd-23-1160 (PMC10797347; doi:10.21037/jtd-23-1160), 2023-12-15
Supplement: jtd-15-12-6741-supplementary.pdf [file jtd-15-12-6741-supplementary.pdf]

## Supplementary

**Table S1** Characteristics of the pulmonary neoplasms of the patients in the control group, expressed both in absolute number (N) and in relative frequency (%)

| Variables         | Subgroups                     | N   | %    |
|-------------------|-------------------------------|-----|------|
| Location          | Right lung                    | 107 | 52.2 |
|                   | Left lung                     | 98  | 47.8 |
| Induction therapy | Chemotherapy                  | 15  | 7.3  |
|                   | Radiotherapy                  | 1   | 0.5  |
| Surgical approach | Thoracotomy                   | 78  | 38.0 |
|                   | VATS                          | 99  | 48.3 |
|                   | VATS converted to thoracotomy | 28  | 13.7 |
| Type of resection | Lobectomy                     | 179 | 87.3 |
|                   | Pneumonectomy                 | 23  | 11.2 |
|                   | Segmentectomy                 | 3   | 1.5  |
| Histology         | Adenocarcinoma                | 68  | 33.2 |
|                   | Epidermoid                    | 113 | 55.1 |
|                   | Carcinoid                     | 2   | 1.0  |
|                   | Neuroendocrine                | 17  | 8.3  |
|                   | Large cells                   | 4   | 2    |
|                   | Unknown                       | 1   | 0.5  |
| Stage             | Unknown                       | 2   | 1.0  |
|                   | IA                            | 46  | 22.4 |
|                   | IB                            | 49  | 23.9 |
|                   | IIA                           | 26  | 12.7 |
|                   | IIB                           | 46  | 22.4 |
|                   | IIIB                          | 1   | 0.5  |
|                   | IV                            | 3   | 1.5  |
|                   | Unknown                       | 2   | 1.0  |
| Adjuvant therapy  | Chemotherapy                  | 63  | 30.7 |
|                   | Radiotherapy                  | 11  | 5.4  |
| Recurrence        |                               | 61  | 29.8 |

VATS, video-assisted thoracic surgery.
